# Supplementary material
Source: PubMed Central journal article supplement (PMC7211606)
Supplement: mmc1.pdf [file mmc1.pdf]

Table 1. Survey questions spanning preclinical and clinical exposure in medical school and faculty engagement

---

- What institution are you from?
- What is your name?
- Do you have a dedicated AUPO Medical Student Educator (MSE)?
  - How many years have they been in that position?
  - Is there funding for this position?
  - What other position, if any, does the MSE hold within the department? (chairman, program director, etc.)
  - What is their subspecialty within ophthalmology?
- Do you have an ophthalmology residency program?
  - Are medical students exposed to or taught by residents?
- What types of exposure do you have for:
  - First year medical students? (lecture, skills training, lab, problem-based learning, other)
  - How many hours of exposure do first year medical students receive?
  - Types of exposure for second year medical students?
  - Hours of exposure for second year medical students?
  - Types of exposure for third year medical students?
  - Hours of exposure for third year medical students?
  - Types of exposure for fourth year medical students?
  - Hours of exposure for fourth year medical students?
- Is there a required clinical ophthalmology rotation?
  - How long is it?
  - Is time spent in the OR?
- Is ophthalmology a choice during the M3 surgery block?
- Do you have an ophthalmology elective?
  - Is there more than one type of elective?
  - How many weeks is it?
  - How much time is spent in clinic?
  - How much time is spent in the OR?
  - How many students take it each year?
- Do you have a research elective?
  - How long is it?
  - How many students take it each year?
- Are there other opportunities for medical students to get involved in research?
- Do you have any equipment that aids in teaching? If so, what equipment?
- Do you use the AUPO guidelines in assisting the writing of your ophthalmology curriculum?
- Is anyone in the department a member of the schools curriculum, retention, or other committees?
  - Is anyone on specifically the curriculum committee?
- Are you doing anything outside of the curriculum for medical students?
- Do you have a freecare/outreach/community service experience for students?
- Is there an ophthalmology interest group?
- Do you have career fairs?
- Do you have student advisers in the department?
- Are there additional opportunities (non-committee, non-curriculum) that can provide faculty opportunities to work with medical students (i.e. medical student mentoring programs, CV workshops, etc.)? If yes, please specify:

---

AUPO = Association of University Professors of Ophthalmology

Description: Survey questions modeled off of previous survey by Shah et al.<sup>8</sup>
