# Supplementary material
Source: PubMed Central journal article supplement (PMC7211606)
Supplement: mmc2.pdf [file mmc2.pdf]

Table 2. Summary of clinical and research exposure

| Elective characteristic                      | # (%)                         |
|----------------------------------------------|-------------------------------|
| Ophthalmology elective:                      | 95 (100%)                     |
| More than one type of elective:              | 76 (80%)                      |
| Four week elective:                          | 81 (85%)                      |
| Two week elective:                           | 46 (48%)                      |
| Time spent in OR:                            | 24% (n=85)                    |
| Students per year (#):                       | mean = 27, median = 18 (n=93) |
| Ophthalmology not offered in surgery block:  | 38 (40%)                      |
| Research elective offered:                   | 68 (72%)                      |
| Four weeks:                                  | 51 (55%)                      |
| Range of length:                             | 1 week to 1 year              |
| Students per year (#):                       | 5 (n=66)                      |
| Research opportunities outside of clerkship: | 90 (95%)                      |

AUPO = Association of University Professors of Ophthalmology

Description: Clinical exposure among AUPO institutions measured across different elective options, integration into other courses, and student participation
