# Supplementary material
Source: PubMed Central journal article supplement (PMC7211606)
Supplement: mmc3.pdf [file mmc3.pdf]

Table 3. Associations of institutions with a DMSE and curricular, extracurricular, and faculty engagement variables

| Survey question                                                                                                   | Dedicated DMSE (n=79) | No dedicated DMSE (n=17) | P-value | Power                         |
|-------------------------------------------------------------------------------------------------------------------|-----------------------|--------------------------|---------|-------------------------------|
| Do you have a dedicated AUPO Medical Student Educator?                                                            | 79 (100%)             | -                        |         |                               |
| Do you have a coordinator who is dedicated to medical student education?                                          | 53/78 (67.9%)         | 9/16 (56.3%)             | 0.54    |                               |
| Are you doing anything outside the curriculum for medical students?                                               | 65/79 (82.3%)         | 8/16 (50%)               | 0.014   | 0.797<br>(Alpha=0.05, N=95)   |
| Are there additional opportunities that can provide faculty opportunities to work with medical students?          | 55/77 (71.4%)         | 8/16 (50%)               | 0.17    |                               |
| Is there an ophthalmology interest group?                                                                         | 74/79 (93.7 %)        | 11/16 (68.8%)            | 0.012   | 0.842<br>(Alpha=0.05, N = 95) |
| Do you have career fairs?                                                                                         | 62/78 (79.5%)         | 11/16 (68.8%)            | 0.54    |                               |
| Do you have a freecare/outreach/community service experience for students?                                        | 61/78 (78.2%)         | 10/16 (62.5%)            | 0.31    |                               |
| Do you have student advisers in the department?                                                                   | 68/79 (86.1%)         | 8/16 (50%)               | 0.003   | 0.910<br>(Alpha=0.05, N=95)   |
| Is anyone in the department of ophthalmology a member of the school's curriculum, retention, or other committees? | 48/78 (61.5%)         | 9/16 (56.3%)             | 0.91    |                               |
| Is there an ophthalmology faculty member on specifically the curriculum committee?                                | 23/77 (29.9%)         | 6/15 (40%)               | 0.64    |                               |
| Do you use the AUPO guidelines in assisting the writing of your ophthalmology curriculum?                         | 39/75 (52.0%)         | 5/16 (31.3%)             | 0.22    |                               |

DMSE = dedicated Director of Medical Student Education

Description: Respondents' answers to survey questions compared by institutions with and without a DMSE was analyzed with Chi Square analysis to highlight any significant associations between the presence of a DMSE and various measures in the survey.
